# Supplementary material for: Risk stratification of cutaneous melanoma reveals carcinogen metabolism enrichment and immune inhibition in high-risk patients
Source: publisher site journal article supplement (doi:10.18632/aging.103734), 2020-08-28
Supplement: Supplementary file [file aging-v12i16-103734-supplementary-material-SD1.pdf]

## SUPPLEMENTARY FIGURE

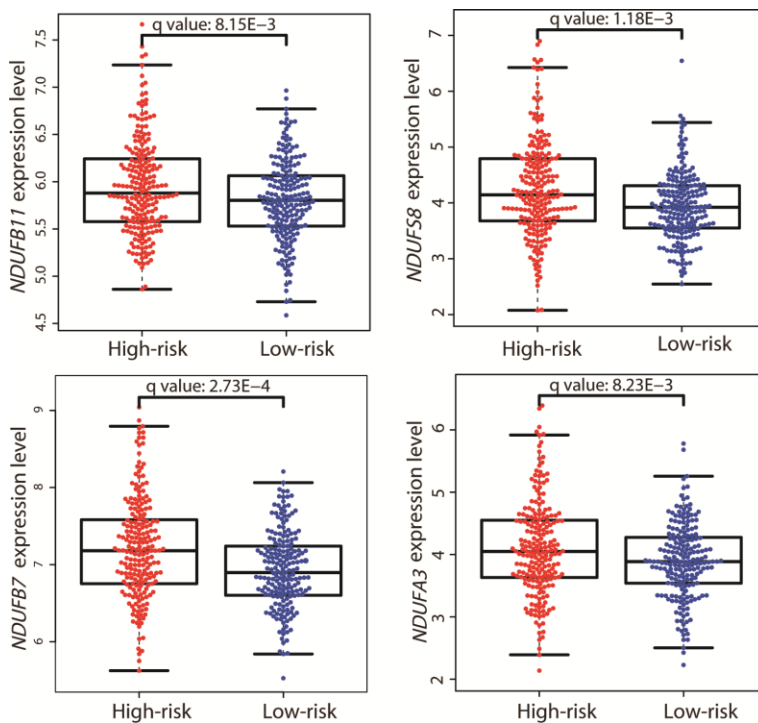

**Supplementary Figure 1. Expression differences in the four NADH dehydrogenase genes between the two risk groups.** Distribution of *NDUFA3*, *NDUF7*, *NDUF58*, and *NDUF11* expression in the two risk groups. The expression levels are represented by log<sub>2</sub>-transformed RPKM values. The *P* value was calculated by a two-sided Student's *t* test and adjusted using the Benjamini–Hochberg method.
